# Supplementary material for: Developing and validating of Ramathibodi Appendicitis Score (RAMA-AS) for diagnosis of appendicitis in suspected appendicitis patients
Source: Springer Nature journal article supplement (doi:10.1186/s13017-017-0160-3), 2017-11-09

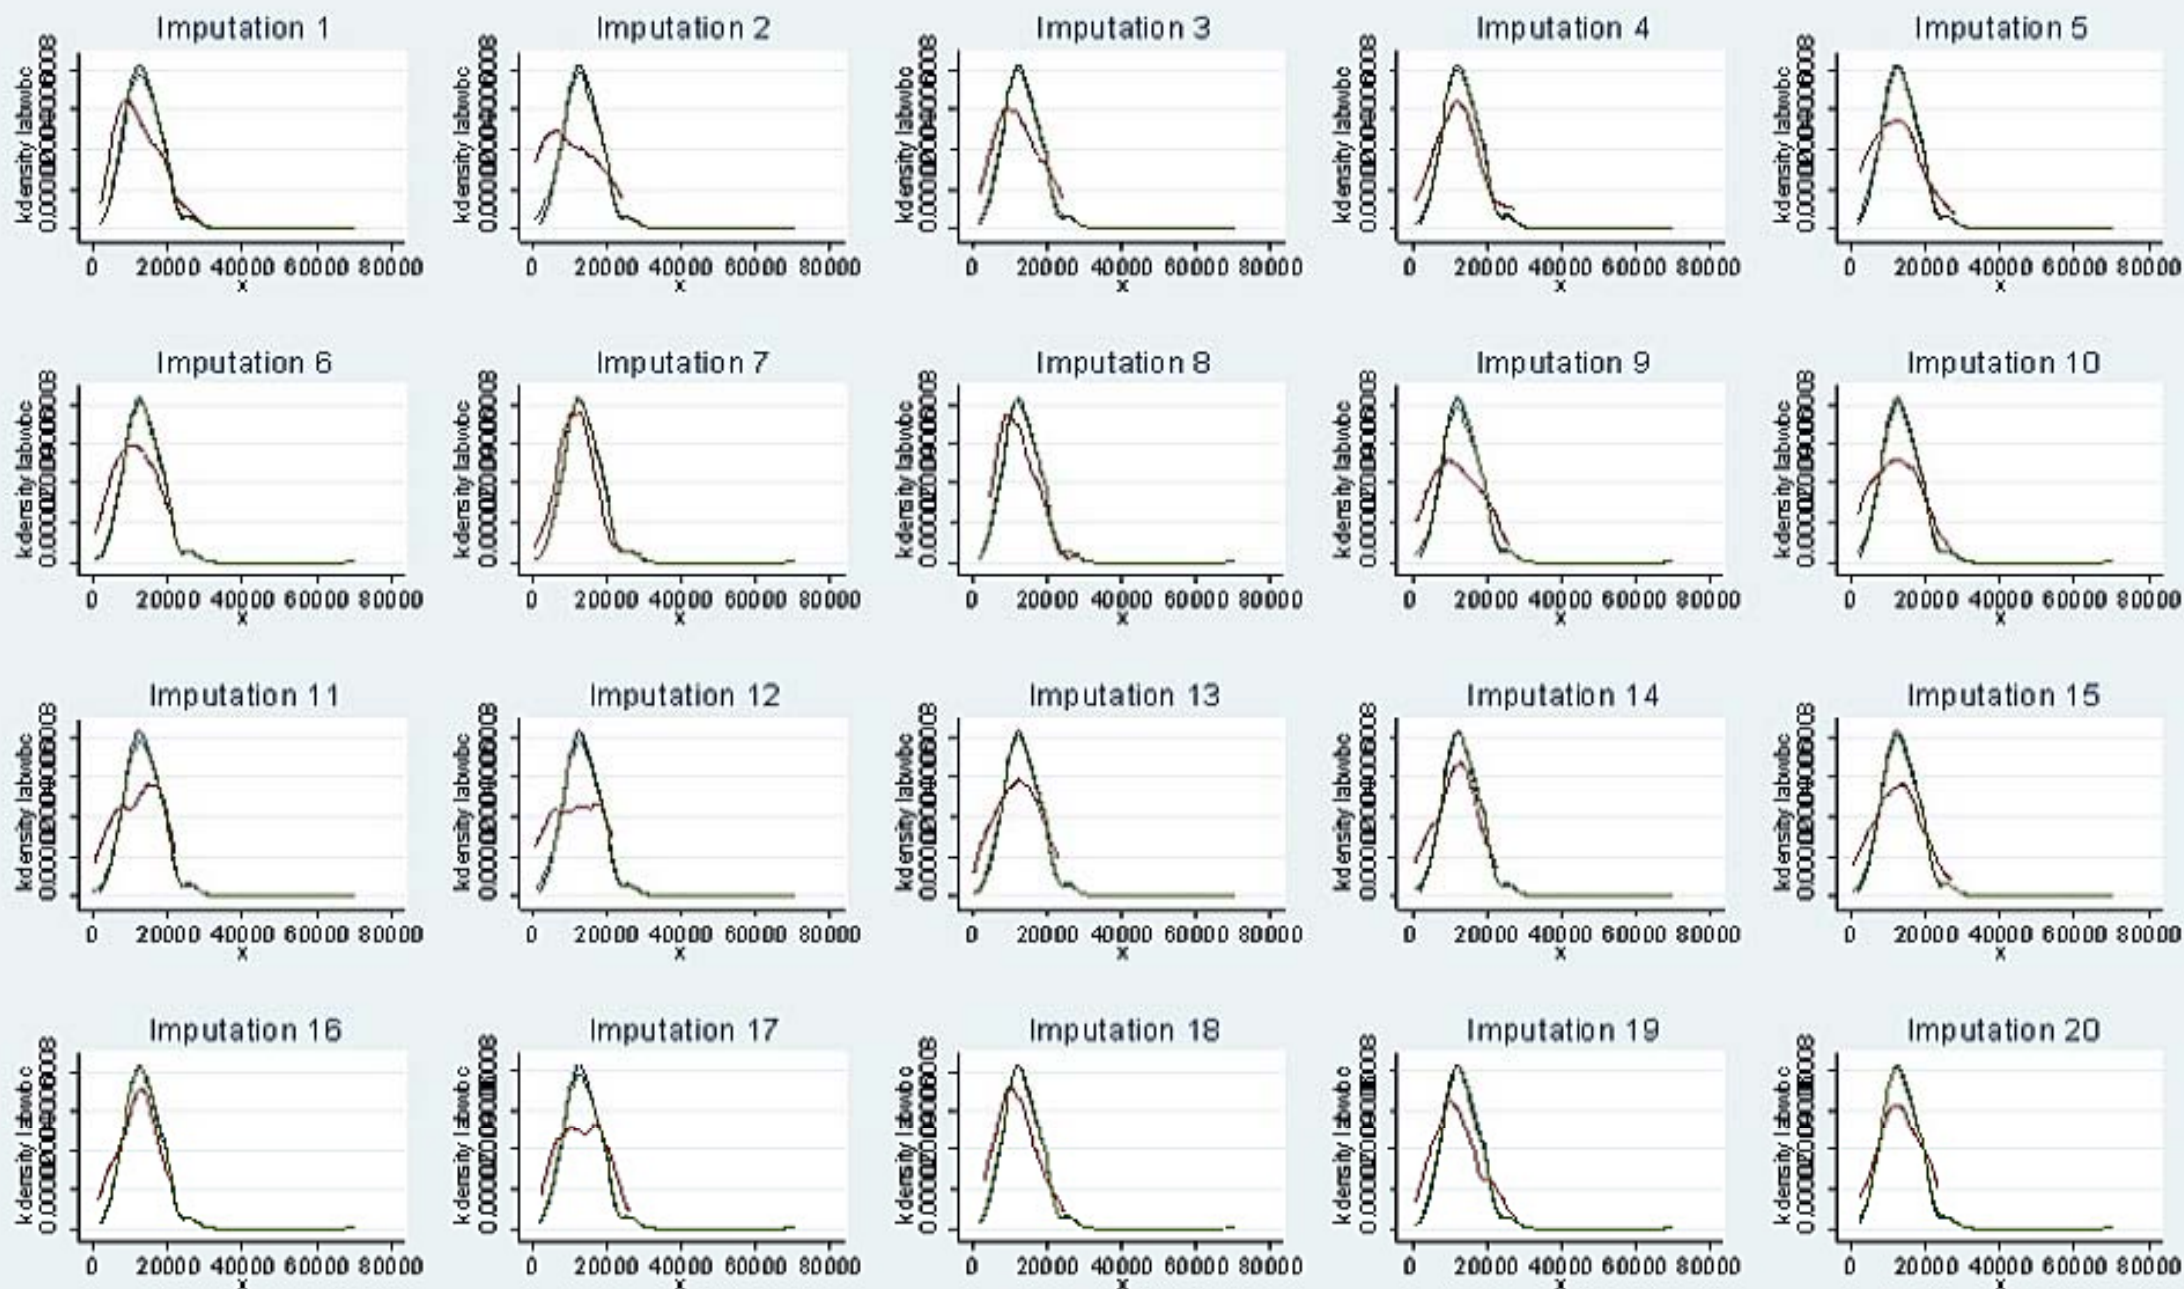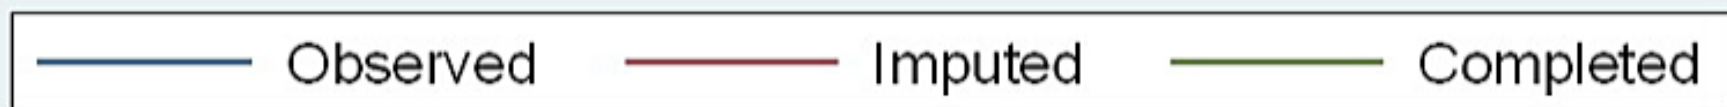

Supplement: MOESM2 [file 15209982]
