# Supplementary material for: Developing and validating of Ramathibodi Appendicitis Score (RAMA-AS) for diagnosis of appendicitis in suspected appendicitis patients
Source: Springer Nature journal article supplement (doi:10.1186/s13017-017-0160-3), 2017-11-09
Supplement: MOESM3 [file 15209982]

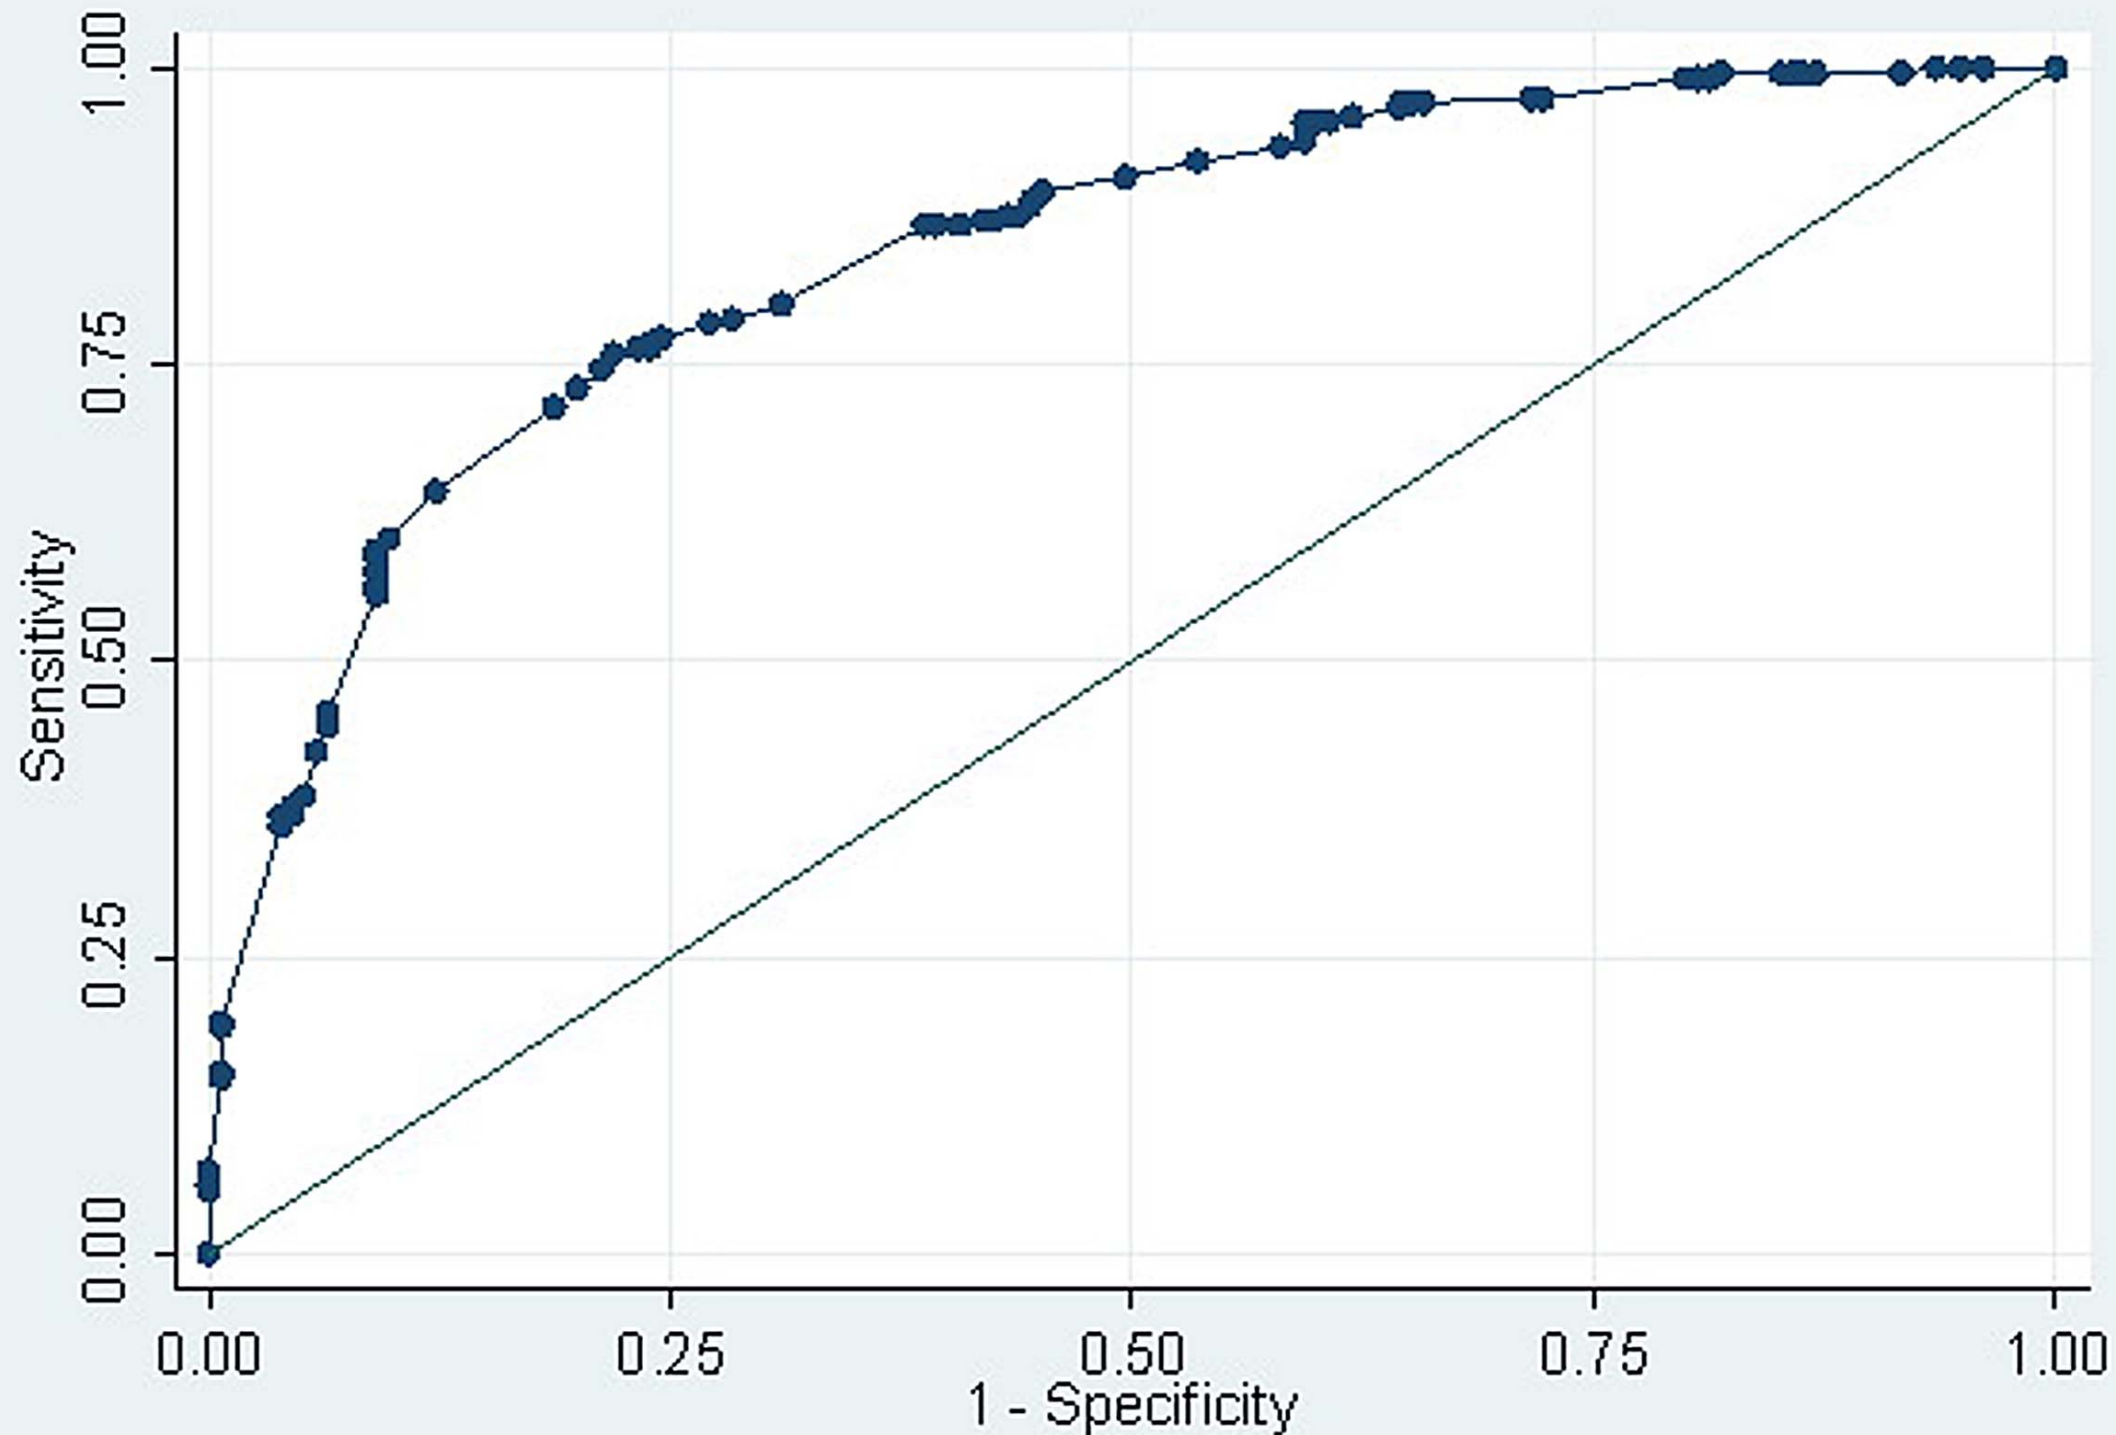

Area under ROC curve = 0.8422
